RESEARCH ARTICLE

# Associations between body mass index, mid-arm circumference, calf circumference, and functional ability over time in an elderly Taiwanese population

Hsin-Jen Tsai\*, Fu-Kuei Chang

Department of Health Management, I-Shou University, Kaohsiung, Taiwan

\* [hsinjen@gmail.com](mailto:hsinjen@gmail.com)

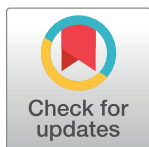

OPEN ACCESS

**Citation:** Tsai H-J, Chang F-K (2017) Associations between body mass index, mid-arm circumference, calf circumference, and functional ability over time in an elderly Taiwanese population. PLoS ONE 12(4): e0175062. <https://doi.org/10.1371/journal.pone.0175062>

**Editor:** Gianluigi Fortoni, Istituto Di Ricerche Farmacologiche Mario Negri, ITALY

**Received:** August 27, 2016

**Accepted:** March 20, 2017

**Published:** April 11, 2017

**Copyright:** © 2017 Tsai, Chang. This is an open access article distributed under the terms of the [Creative Commons Attribution License](https://creativecommons.org/licenses/by/4.0/), which permits unrestricted use, distribution, and reproduction in any medium, provided the original author and source are credited.

**Data Availability Statement:** This study is based on data from the TLSA which was provided and managed by the Health and Welfare Data Science Center (HWDC), Ministry of Health and Welfare (<http://www.mohw.gov.tw/CHT/Ministry/Index.aspx>), Taiwan. Due to legal restrictions imposed by the government of Taiwan in relation to the Personal Information Protection Act, data cannot be made publicly available. The use of TLSA data is limited to research purposes only. Requests for data can be sent as a formal proposal to the HWDC, Ministry of Health and Welfare (<http://www.mohw.gov.tw/CHT/Ministry/Index.aspx>).

## Abstract

### Background

Anthropometric measurements such as body mass index (BMI), mid-arm circumference (MAC), and calf-circumference (CC) are assessed with ease during regular health visits, but the associations between these anthropometric parameters and functional ability in elderly population over time has not been studied in detail. This study aimed to examine the associations between functional ability and the anthropometric parameters BMI, MAC, and CC in Taiwanese adults  $\geq 65$  years old.

### Methods

Data were obtained from the Taiwan Longitudinal Study of Aging and analyzed retrospectively.

### Results

Functional decline over a 4- and 8-year period was noted in approximately 14% and 21% of study participants, respectively. BMI was negatively associated with participants' current Activities of Daily Living (ADL) scores, and was positively associated with 4-year ADL scores in adults  $\geq 65$  years old ( $\beta = -1.19$  and  $1.14$ ,  $P = 0.0010$  and  $0.0420$ , respectively). MAC and CC were negatively associated with current ADL scores ( $\beta = -1.46$ ,  $P < 0.0001$  and  $\beta = -4.68$ ,  $P < 0.0001$ , respectively). The association between CC and current ADL score was stronger than the association between current ADL score and either BMI or MAC. For adults  $\geq 65$  years old, a high BMI increased the risk of ADL decline over 4 and 8 years by 4-fold and 3-fold (adjusted odds ratio =  $4.23$  and  $2.64$ , 95% confidential interval =  $1.95-9.19$  and  $1.22-5.71$ ,  $P = 0.0003$  and  $0.0141$ , respectively).

### Conclusions

BMI is a significant predictor of decline of functional ability in Taiwanese adults  $\geq 65$  years old. CC is an important anthropometric indicator of current functional ability among older adults.

[www.mohw.gov.tw/CHT/Ministry/Index.aspx](http://www.mohw.gov.tw/CHT/Ministry/Index.aspx),

Taiwan and applicants must follow the Computer-Processed Personal Data Protection Law and related regulations of HWDC, Ministry of Health and Welfare, Taiwan. An application and agreement must be signed by the research applicants upon application submission. All applications are reviewed by HWDC for approval of data release.

**Funding:** The author(s) received no specific funding for this work.

**Competing interests:** The authors have declared that no competing interests exist.

## Introduction

Taiwan is one of the most rapidly aging societies in the world. The proportion of adults  $\geq 65$  years old was 11% in 2010, and is expected to reach 20% in 2025 [1, 2]. As a consequence, aging and aged-related issues have become a public health concern. In 2013, the World Health Organization highlighted the importance of frailty in an aging society [3]. Frailty in the elderly is related to aging, functional disability and comorbidity [4]. One of the major phenotypes of frailty in older adults is a loss of their ability to independently perform activities of daily living (ADLs) [5, 6]. It is estimated that close to 15% of elderly adults  $\geq 70$  years old experience some limitation in their ability to perform ADLs [7], and this increases to up to 46% in institutionalized adults  $\geq 65$  years old [8]. This decline in functional ability negatively impacts the health and quality of life of older adults, and ultimately leads to a higher mortality rate and a heavy societal burden [9–11]. Therefore, it is of great importance to society and its members to identify factors which can predict this decline in functional ability, and to delay or prevent its occurrence altogether.

Weight, height, and body mass index (BMI) are parameters which are easily obtained as part of patients' regular physical checkups, and are frequently used anthropometric tools. Previous studies have reported that these factors are associated with health status, disability, and mortality in the elderly [12–15]. Other simple anthropometric parameters include mid-arm circumference (MAC) and calf circumference (CC) [13], and these were reported to be associated with mortality in the elderly institutionalized population [8]. However, MAC and CC are less frequently used anthropometric measurements, and the associations between these and functional ability have received little attention.

The proportions of frail and pre-frail adults  $\geq 65$  years old in Taiwan is approximately 4.9% and 40%, respectively [5]. Delaying the onset of frailty can improve the quality of life and decrease the mortality of older adults. Early detection of frailty syndrome in the elderly is becoming a priority among medical practitioners, as is identifying predictors of frailty which may help to anticipate and ideally prevent a decline in functional ability. Functional ability in old adults is often defined as the ability to carry out ADL, including bathing, dressing, and other independent living skills, such as shopping and housework. ADL functions are concerned with an old adult's self-care, whereas independent living functions are concerned with self-reliant functioning in a given environment. The evaluation of functional ability in old adults in the present study is focused on the ADL evaluation. Anthropometric measurements such as BMI, MAC, and CC, are simple, non-invasive and easy-to-use tools in routine health assessments. However, the associations between these and functional ability over time in older adults has not been investigated in detail, and data on the ability of these parameters to predict changes in functional ability over time are limited. Therefore, our hypothesis is that the anthropometric measurements, BMI, MAC and CC, were associated with subsequent ADL. The present study examined the cross-sectional and longitudinal associations between BMI, MAC, CC and functional ability and its decline in Taiwanese adults  $\geq 65$  years old.

## Methods

### Study design

This study is based on data from the Taiwan Longitudinal Study of Aging (TLSA) which was provided and managed by the Health and Welfare Data Science Center (HWDC), Ministry of Health and Welfare, Taiwan. As a population-based longitudinal study with a national representative sample launched in 1989, TLSA evaluates the health and well-being of nearly-old and old individuals in Taiwan. Details of the study design and method have been described and

documented elsewhere [16]. TLSA uses a stratified multi-staged equal probability sampling design with township as the primary sampling unit. First, TLSA recruited 4049 nearly-old and old adults  $\geq 60$  years old in 1989 to undertake a survey, and regularly followed up these participants every 3 to 4 years [17, 18]. Participants aged with time and thus, with the same sampling and design, TLSA recruited 2462 and 1599 new participants aged 50–66 years old in 1996 and 2003, respectively, in order to replenish the proportion of young-old population. In total, six waves of TLSA were completed (1989, 1993, 1996, 1999, 2003 and 2007). TLSA excluded Taiwanese aboriginals.

An in-home and in-person questionnaire was conducted by trained investigators. Questions included socio-demographic, lifestyle, health, social functioning, and healthcare information. The 1999 survey uniquely collected nutritional and dietary data, including some anthropometric parameters. Thus, data regarding the anthropometric parameters MAC and CC were only available in the 1999 survey. This study selected the 1999 survey data as a baseline dataset and the 2007 survey as the end-point. In total, 4440 participants aged  $\geq 53$  years old completed the survey in 1999. Of those, 3778 and 3132 participants were successfully traced and interviewed in the 2003 and 2007 surveys, respectively. TLSA was approved by government-appointed representatives in Taiwan. All study participants provided informed written consent. All identified information of participants were removed when data were released from the HWDC, Ministry of Health and Welfare, Taiwan. Therefore, the data was analyzed anonymously. The present study was a secondary analysis of TLSA, was reviewed and review exemptions had been approved by Institutional Review Board of the E-Da Hospital.

### Anthropometric parameters

Anthropometric parameters included height, weight, MAC and CC. Self-reported height and weight were used to calculate BMI. BMI ( $\text{kg}/\text{m}^2$ ) was calculated as weight in kilograms divided by height in square meters. MAC and CC were measured by trained investigators. Anthropometric parameters have population- and gender-specific characteristics [19]. In order to avoid the effects of population and sex, measured values of anthropometric variables were standardized for analysis. BMI, MAC and CC were individually divided by values that were Taiwanese-specific anthropometric points, and which were used in the Taiwan version of the Mini-Nutritional Assessment for the elderly [20, 21]. This was done by dividing each participant's (male and female) BMI by 21 ( $\text{kg}/\text{m}^2$ ). MAC was divided by 23.5 (cm) for men and 22 (cm) for women, while CC was divided by 30 (cm) for men and 27 (cm) for women. Standardized BMI, MAC and CC values were continuous variables and were used in the linear and logistic regression analyses.

### Functional ability

We evaluated functional ability in our study population using a six-item basic ADL assessment. Evaluation of ADLs included the need for assistance while bathing, dressing/undressing, eating, getting out of bed/standing up/sitting in a chair, moving around the house, and going to the toilet [22]. Each item was scored from 0 (no difficulty) to 3 (unable to do it). We then calculated the change in ADL score over 4 and 8 years.

### Other variables

Other variables included socio-demographic factors, lifestyle factors, and co-morbid conditions. Socio-demographic variables included gender, age and years of formal education. Lifestyle factors included smoking, alcohol consumption, and exercise. Smoking habits were ascertained from the following question: "do you smoke and "how many cigarettes do you

smoke per day?" Responses were "yes/no" and "none, 1–4, 5–9, and  $\geq 10$  cigarette/day", respectively. Alcohol consumption was ascertained by asking the question "Do you drink alcohol?", and responses were recorded as "yes/no". Exercise habits were ascertained by asking: "Do you usually exercise?" and responses were "no,  $\leq 2$ , 3–5 and  $\geq 6$  times/week (wk)". Response categories were regrouped as " $\leq 2$  times/wk" and " $\geq 3$  times/wk".

Co-morbid conditions were assessed by counting the number of self-reported medical conditions, including hypertension, diabetes, heart diseases, stroke, cancer, lung diseases, arthritis/rheumatism, gastric ulcer/gastric diseases, liver/gallbladder diseases, hip fracture, cataract, kidney disease, gout and bone spurs.

## Data analysis

Descriptive data were weighted for the sampling design. Multivariate linear regression analyses were performed to evaluate the cross-sectional and longitudinal associations between BMI, MAC, CC and current and subsequent ADL scores after adjusting for confounding factors. Confounding factors included socio-demographics, lifestyle factors, and the number of comorbid diseases. Multivariate logistic regression analyses were performed to evaluate the longitudinal associations between BMI, MAC, CC, and functional decline over a 4 and 8 year period. Study subjects were elderly adults  $\geq 65$  years old. Functional decline was defined as a reduction in ADL score  $\geq 1$  points over 4 and 8 years. BMI, MAC and CC were incorporated into linear and logistic regression models individually to avoid collinear effects. The correlation coefficients between BMI and MAC, MAC and CC, and BMI and CC were 0.57, 0.55, and 0.59, all  $p < 0.0001$ . Since CC could be affected by the presence of leg edema, the data obtained from subjects with edematous legs were excluded from the analysis. The  $\beta$  coefficients, adjusted odds ratio (aOR) and 95% confidential intervals (95% CI) were reported. The SAS statistical software package (SAS Institute Inc, Cary, NC, USA) version 9.1 was used for all statistical analyses. Statistical significance was evaluated as  $\alpha = 0.05$ . Probability levels of  $P < 0.01$  and  $P < 0.001$  were also given.

## Results

**Table 1** shows the baseline characteristics of the study participants. The average age of the study population was 73 years old, and participants had an average of 2 comorbidities. The average ADL score at baseline was 0.93. The average BMI, MAC and CC were 23.17 kg/m<sup>2</sup>, 27.96 cm, and 33.35 cm, respectively. When ADLs were reassessed at 4 and 8 years after baseline, the proportion of adults who experienced functional decline was 13.70% and 20.76%, respectively.

**Table 2** shows the multivariate linear regression analysis of the associations between standardized baseline anthropometric measurements (BMI, MAC, CC) and current and subsequent ADL scores. After adjusting for confounding factors, the standardized baseline BMI was negatively associated with the baseline ADL score ( $\beta = -1.19$ ,  $P = 0.0010$ ), and positively associated with the ADL score 4 years after baseline ( $\beta = 1.14$ ,  $P = 0.0420$ ). The standardized baseline MAC was negatively associated with the baseline ADL score ( $\beta = -1.46$ ,  $P < 0.0001$ ), as was the standardized baseline CC ( $\beta = -4.68$ ,  $P < 0.0001$ ). None of standardized baseline anthropometric measurements were associated with the ADL score obtained 8 years after baseline.

**Table 3** shows the multivariate logistic regression analysis of the longitudinal associations between the standardized baseline values for BMI, MAC, and CC, and subsequent ADL decline over 4 and 8 years. The standardized baseline BMI was positively associated with ADL decline over 4 and 8 years (aOR (95% CI) = 4.23 (1.95–9.19) and 2.64 (1.22–5.71),  $P = 0.0003$  and 0.0141, respectively), while standardized MAC and CC were not.

**Table 1. Characteristic of study participants at baseline<sup>a</sup>.**

|                                                 | N = 2988     |
|-------------------------------------------------|--------------|
| Age (y)                                         | 73.26 ± 5.73 |
| Education (y)                                   | 4.85 ± 3.91  |
| Smoking (%)                                     | 23.33        |
| Number of cigarette per day (%)                 |              |
| 0                                               | 86.36        |
| 1–4                                             | 1.32         |
| 5–9                                             | 2.17         |
| ≥ 10                                            | 10.15        |
| Drinking (%)                                    | 22.92        |
| Exercising (%)                                  | 55.14        |
| Frequency of exercise per week (times/week) (%) |              |
| 0                                               | 38.94        |
| ≤ 2                                             | 5.92         |
| 3–5                                             | 9.98         |
| ≥ 6                                             | 45.15        |
| Number of diseases                              | 2.16 ± 1.58  |
| ADL score                                       | 0.93 ± 2.98  |
| BMI (kg/m <sup>2</sup> )                        | 23.17 ± 3.07 |
| MAC (cm)                                        | 27.96 ± 3.46 |
| CC (cm)                                         | 33.35 ± 3.41 |
| Functional decline (%) <sup>b</sup>             |              |
| 4-year                                          | 13.70        |
| 8-year                                          | 20.76        |

**Abbreviation:** ADL, Activities of Daily Living; BMI, Body Mass Index; CC, Calf Circumference; MAC, Mid-Arm Circumference.

<sup>a</sup> Values were weighting-adjusted according to sampling design.

<sup>b</sup> Functional decline was defined as a reduction in ADL score ≥ 1 points.

<https://doi.org/10.1371/journal.pone.0175062.t001>

## Discussion

This study demonstrated that BMI, MAC and CC correlate with current and subsequent ADL scores. Moreover, the correlations between these variables and functional ability and decline at 4 and 8 years are independent of each other.

**Table 2. Multivariate linear regression analysis of the associations<sup>a</sup> of standardized baseline BMI, MAC and CC with current and subsequent ADL scores.**

|         | ADL score   |       |         |         |       |        |         |       |        |
|---------|-------------|-------|---------|---------|-------|--------|---------|-------|--------|
|         | At baseline |       |         | At 2003 |       |        | At 2007 |       |        |
|         | N           | β     | P       | N       | β     | P      | N       | β     | P      |
| Std BMI | 2818        | -1.19 | 0.0010  | 2137    | 1.14  | 0.0420 | 1635    | 1.13  | 0.1579 |
| Std MAC | 2859        | -1.46 | <0.0001 | 2177    | 0.34  | 0.5131 | 1655    | -0.98 | 0.2042 |
| Std CC  | 2839        | -4.68 | <0.0001 | 2162    | -1.39 | 0.0529 | 1642    | -1.00 | 0.3422 |

**Abbreviation:** ADL, Activities of Daily Living; BMI, Body Mass Index; CC, Calf Circumference; MAC, Mid-Arm Circumference; Std, Standardized.

<sup>a</sup> Adjusted for gender, age, years of formal education, lifestyle factors and the number of diseases.

<https://doi.org/10.1371/journal.pone.0175062.t002>

**Table 3. Multivariate logistic regression analysis of the longitudinal associations<sup>a</sup> of standardized baseline BMI, MAC and CC with subsequent ADL decline<sup>b</sup> over 4 and 8 years.**

|         | ADL decline 1999–2003 |                  |        | ADL decline 1999–2007 |                  |        |
|---------|-----------------------|------------------|--------|-----------------------|------------------|--------|
|         | N                     | OR (95%CI)       | P      | N                     | OR (95%CI)       | P      |
| Std BMI | 2137                  | 4.23 (1.95–9.19) | 0.0003 | 1635                  | 2.64 (1.22–5.71) | 0.0141 |
| Std MAC | 2177                  | 1.48 (0.74–2.97) | 0.2706 | 1655                  | 1.06 (0.50–2.25) | 0.8734 |
| Std CC  | 2162                  | 1.13 (0.43–3.01) | 0.8063 | 1642                  | 1.22 (0.44–3.43) | 0.7038 |

**Abbreviation:** ADL, Activities of Daily Living; BMI, Body Mass Index; CC, Calf Circumference; MAC, Mid-Arm Circumference; Std, Standardized.

<sup>a</sup> Adjusted for gender, age, years of formal education, lifestyle factors and the number of diseases.

<sup>b</sup> Functional decline was defined as a reduction in ADL  $\geq$  1 points.

<https://doi.org/10.1371/journal.pone.0175062.t003>

### Body mass index

Cross-sectional results indicated that participants with a high current BMI have a good baseline functional ability, but a high risk of subsequently impaired functional ability. Moreover, in adults  $\geq$  65 years old, a high baseline BMI significantly increases the risk of ADL decline over 4 and 8 years by 4-fold and 3-fold, respectively. Longitudinal aging studies in the United States and the United Kingdom have indicated that a high past BMI was associated with an increased risk of subsequent functional disability [14, 15]. A high BMI increases the risk of chronic diseases, increases the wear and tear on joints, reduces exercise flexibility, and ultimately causes functional limitations and disability [23]. Our results are consistent with those of previous studies, and suggest that BMI can predict functional decline 4 and 8 years later in adults  $\geq$  65 years old.

### Calf circumference

Analysis results indicated that CC was associated with current functional ability, but not with subsequent ADL score and ADL decline at 4 and 8 years after baseline. A high CC reflects a better current functional ability in elderly Taiwanese adults. In a study of elderly individuals living in long-term care facilities, CC was found to be significantly correlated with physical function [24]. A higher CC was also associated with a better functional performance in community-dwelling elderly adults [25, 26]. In our study, the  $\beta$  coefficient for the association between CC and current ADL scores ( $\beta = -4.68$ ) was higher by nearly 4-fold and 3-fold than those for BMI ( $\beta = -1.19$ ) and MAC ( $\beta = -1.46$ ). Therefore, CC (rather than BMI and MAC) more accurately reflects the current functional ability of elderly adults. A higher CC indicates more skeletal muscle mass and strength [25, 26], and thus it is not surprising that elderly adults with a higher CC consequently have a better current functional performance. Therefore, CC is a significant predictor of the current functional ability of old adults.

### Mid-arm circumference

This study observed that a baseline MAC was negatively associated with current ADL score in Taiwanese adults  $\geq$  65 years old. In the Nagoya Longitudinal Study of Frail Elderly, MAC was significantly correlated with the ADL score [27]. In this study, we found that MAC was not associated with subsequent ADL score or with ADL decline over 4 and 8 years. Thus, MAC is not an accurate predictive factor of subsequent ADL score and functional decline. These results are consistent with those of a previous study of community-dwelling men and women  $>70$  years old, which concluded that arm circumference was not associated with subsequent ADL impairment [12]. Furthermore, a study of Japanese community-dwelling frail elders



observed that MAC was not an independent predictor of ADL decline during a 2-year period [28]. The ability to independently perform ADLs depends mostly on the presence of adequate mobility, and requires minimum mass and strength in the upper and lower limbs. Taken together, the results described by previous studies and our own suggest that MAC correlates poorly with functional ability as defined by the ability to perform ADLs. Furthermore, MAC was not associated with subsequent functional ability or decline in functional ability.

Observations for the associations between the anthropometric parameters and instrumental ADL (IADL) are limited. These observations focused on the associations of BMI with IADL and reported that BMI were associated with IADL scores [29–33]. BMI was significantly and positively correlated with IADL scores [29]. A longitudinal study reported that BMI values ranging between 23 and 27 was significantly associated with lower risks of IADL functional declines in the subsequent 5 years in healthy France elders [30]. Old adults with low and high BMI had increased risks of developing IADL disability [31–33].

Previous studies investigated the correlations between the anthropometric parameters and cognition and comorbidities. Some studies described the associations of BMI with cognition and reported that BMI was positively associated with risks of cognitive decline [30, 34–36]. A longitudinal study observed that BMI values ranging between 23 and 27 was associated with lower risks of cognitive declines in the subsequent 5 years for healthy community-dwelling old adults [30]. A high baseline BMI was associated with an increased follow-up risk of cognitive decline [34]. Population-based studies indicated that increased BMI in middle age was a risk factor for dementia at later life [35, 36]. Moreover, the correlations of the anthropometric measurements with comorbidities were observed, especially for BMI. A cohort study reported that increasing BMI categories and obesity were significantly associated with multiple morbidity in UK adults aged  $\geq 30$  years [37]. In a 10-year prospective study, BMI was reported as a predisposing risk factors for multiple morbidities among initially disease-free population [38].

## Strengths and limitations

This study has a number of strengths, including the fact that it is a prospective population-based study which recruited a large number of Taiwanese participants aged  $\geq 65$  years old. Furthermore, the anthropometric parameters MAC and CC were obtained by trained investigators rather than relying on self-reported measurements. The analysis model was tested at different time points and served as a predictor of change in function ability over time. Predictive analyses were performed for the anthropometric variables BMI, MAC, and CC. Nevertheless, despite its contributions, this study does have certain limitations. First, BMI was calculated using self-reported height and weight, and given that elderly individuals are more likely to report their adult height, which is likely higher than their current height, it is possible that there was some inaccuracy in these measurements. Second, height and weight data may be inaccurate for those participants who had not recently visited a health provider or been weighed, and as a consequence, BMI may have been underestimated [30]. Although we obtained baseline data of the anthropometric measurements of interest, we did not consider any changes which may have occurred in these variables throughout the follow-up period. This is partly due to the fact that MAC and CC were not measured regularly in the TLSA, and thus this information was unavailable in the follow-up surveys. Therefore, we were unable to monitor changes in MAC and CC, and thus unable observe the relationship between these variables and functional decline. Third, more sophisticated anthropometric measurements such as dual energy X-ray absorptiometry (DEXA), were unavailable in the TLSA. Fourth, for old adults, functional ability has a broad range. Functional ability may include abilities for activities of daily living and independent living skills. However, in the present study, we focused on

the associations of BMI, MAC and CC with ADL. Independent living ability for old adults were usually evaluated by IADL. IADL was not included in this analysis. The further investigations of the associations of BMI, MAC, and CC with IADL may be needed. Fifth, measurements of functional status were self-reported and the study lacked performance-based measures of functional ability. In TLSA, ADL was evaluated using self-reported information. Although a source of bias needs to be considered, studies indicated that self-reported data on functional disability have adequate validity and were consistent with medical diagnoses and physical tests [39]. Sixth, recall bias and misclassifications cannot be ruled out. Data missing may be due to participants' cognition, health status, and frailty. Frailty old adults or those with cognitive impairments may be excluded from our analysis due to incomplete ADL evaluations and anthropometric measurements. Thus, selection bias might exist. The findings described above may not be generalizable to other populations with different races, cultures and lifestyles.

### Implication

Our findings have relevant implications for clinicians and public health organizers. These finding supports the routine measurements of BMI, MAC and CC in old persons in the clinical setting would be useful. BMI, MAC and CC measurements offers several advantages. It is easy to perform, less time consuming and not limited by functional capacity, cognition and comorbidities. Anthropometric assessments are efficient tools as the first step in screening old adults to identify those at increased risk of functional decline and disability and to target disability prevention interventions. We increase the awareness of the clinical relevance of these easy-used and easy-measured anthropometric measures on the functional ability. Early detection of clinical functional decline and disability can be achieved. Early detection in turn may help to lessen future disability and it increases the number of disability-free years among old people.

### Conclusions

This study demonstrated that BMI, MAC, and CC are all associated with current functional ability for elderly adults  $\geq 65$  years of age. A high BMI significantly increases the risk of subsequent ADL decline over 4 and 8 years. Compared to BMI and MAC, a high CC is a significant predictor of current functional ability in adults  $\geq 65$  years old. Finally, MAC was not related with either subsequent functional ability or decline of functional ability in this study population. The results of this study suggest that BMI can be used as a long-term predictor of functional decline in elderly Taiwanese adults  $\geq 65$  years old, while CC is a good indicator of current functional ability.

### Acknowledgments

This study used data from the TLSA which was provided and managed by the Health and Welfare Data Science Center (HWDC), Ministry of Health and Welfare (<http://www.mohw.gov.tw/CHT/Ministry/Index.aspx>), Taiwan. The conclusions expressed here do not represent those of the administration.

### Author Contributions

**Conceptualization:** HJT.

**Data curation:** HJT.

**Formal analysis:** HJT FK.C.



**Funding acquisition:** HJT.

**Investigation:** HJT.

**Methodology:** HJT.

**Project administration:** HJT.

**Resources:** HJT.

**Software:** HJT.

**Supervision:** HJT.

**Validation:** HJT.

**Visualization:** HJT.

**Writing – original draft:** HJT.

**Writing – review & editing:** HJT.

## References

1. Council for Economic Planning and Development, Taiwan, Rep. of China. Population projections for Taiwan areas: 2008–2056. Medium variant. Yearend population by three-stage age group, dependency ratio and index of aging for Taiwan Area, 2008. Available from: <http://www.cepd.gov.tw/encontent/m1.aspx?sNo=0001457>. Assessed 07 January 2014.
2. Council of Labor Affairs, the Ministry of Interior. Foreign Workers Statistics, 2010. Available from: <http://statdb.cla.gov.tw/html/mon/c12010.pdf>. Assessed 07 January 2014.
3. World Health Organization. What WHO is doing: Guidance on frailty, 2013. Available from: <http://www.who.int/ageing/about/whoactivities/en/index1.html>. Assessed 26 September 2015.
4. Fried LP, Tangen CM, Walston J, Newman AB, Hirsch C, Gottdiener J, et al. Cardiovascular Health Study Collaborative Research Group. Frailty in older adults: evidence for a phenotype. *J Gerontol A Biol Sci Med Sci*. 2001; 56: M146–156. PMID: [11253156](https://pubmed.ncbi.nlm.nih.gov/11253156/)
5. Chen CY, Wu SC, Chen LJ, Lue BH. The prevalence of subjective frailty and factors associated with frailty in Taiwan. *Arch Gerontol Geriatr*. 2010; 50: S43–47. [https://doi.org/10.1016/S0167-4943\(10\)70012-1](https://doi.org/10.1016/S0167-4943(10)70012-1) PMID: [20171456](https://pubmed.ncbi.nlm.nih.gov/20171456/)
6. Wong CH, Weiss D, Sourial N, Karunanathan S, Quail JM, Wolfson C, et al. Frailty and its association with disability and comorbidity in a community-dwelling sample of seniors in Montreal: a cross-sectional study. *Aging Clin Exp Res*. 2010; 22: 54–62. <https://doi.org/10.3275/6675> PMID: [19940555](https://pubmed.ncbi.nlm.nih.gov/19940555/)
7. Tsai ACH, Lai TM. Predicting the need of formal care in Taiwan: analysis of a national random sample. *Arch Gerontol Geriatr*. 2011; 53: 298–302. <https://doi.org/10.1016/j.archger.2010.12.003> PMID: [21295356](https://pubmed.ncbi.nlm.nih.gov/21295356/)
8. Tsai ACH, Lai MC, Chang TL. Mid-arm and calf circumferences (MAC and CC) are better than body mass index (BMI) in predicting health status and mortality risk in institutionalized elderly Taiwanese. *Arch Gerontol Geriatr*. 2012; 54: 443–447. <https://doi.org/10.1016/j.archger.2011.05.015> PMID: [21663980](https://pubmed.ncbi.nlm.nih.gov/21663980/)
9. Scott WK, Macera CA, Cornman CB, Sharpe PA. Functional health status as a predictor of mortality in men and women over 65. *J Clin Epidemiol*. 1997; 50: 291–296. PMID: [9120528](https://pubmed.ncbi.nlm.nih.gov/9120528/)
10. Asakawa T, Koyano W, Ando T, Shibata H. Effects of functional decline on quality of life among the Japanese elderly. *Int J Aging Hum Dev*. 2000; 50: 319–328. <https://doi.org/10.2190/3TR1-4V6R-MA5M-U1BV> PMID: [11087110](https://pubmed.ncbi.nlm.nih.gov/11087110/)
11. Wu CY, Hu HY, Li CP, Fang YT, Huang N, Chou YJ. The association between functional disability and acute care utilization among the elderly in Taiwan. *Arch Gerontol Geriatr*. 2013; 57: 177–183. <https://doi.org/10.1016/j.archger.2013.04.011> PMID: [23684243](https://pubmed.ncbi.nlm.nih.gov/23684243/)
12. Woo J, Ho SC, Sbam A. Longitudinal changes in body mass index and body composition over 3 years and relationship to health outcomes in Hong Kong Chinese age 70 and older. *J Am Geriatr Soc*. 2001; 49: 737–746. PMID: [11454112](https://pubmed.ncbi.nlm.nih.gov/11454112/)

13. Tsai AC, Chang TL. The effectiveness of BMI, calf circumference and mid-arm circumference in predicting subsequent mortality risk in elderly Taiwanese. *Br J Nutr.* 2011; 105: 275–281. <https://doi.org/10.1017/S0007114510003429> PMID: 21129232
14. Snih SAL, Ottenbacher KJ, Markides KS, Kuo YF, Eschbach K, Goodwin JS. The effect of obesity on disability vs mortality in older Americans. *Arch Intern Med.* 2007; 167: 774–780. <https://doi.org/10.1001/archinte.167.8.774> PMID: 17452539
15. Lang IA, Llewellyn DJ, Alexander K, Melzer D. Obesity, physical function, and mortality in older adults. *J Am Geriatr Soc.* 2008; 56: 1474–1478. <https://doi.org/10.1111/j.1532-5415.2008.01813.x> PMID: 18662211
16. Hermalin AL, Liang J, Chang MC. 1989 survey of the health and living status of the elderly in Taiwan: questionnaire and survey design. Comparative study of the elderly in Asia research report 89–1. Ann Arbor, MI. PSC publications, University of Michigan; 1989.
17. Zimmer Z, Liu X, Hermalin A, Chuang YL. Educational Attainment and transitions in functional status among older Taiwanese. *Demography.* 1998; 35: 361–375. PMID: 9749327
18. Zimmer Z, Martin LG, Chang MC. Changes in functional limitation and survival among older Taiwanese, 1993, 1996 and 1999. *Popul Stud.* 2002; 56: 265–276.
19. World Health Organization. WHO Physical status: the use and interpretation of anthropometry. World Health Organization Technical Report, no.854. Geneva. WHO; 1995.
20. Tsai AC, Ho CS, Chang MC. Population-specific anthropometric cut-points improve the functionality of the Mini Nutritional Assessment (MNA) in elderly Taiwanese. *Asia Pacific J Clin Nutr.* 2007; 16: 656–662.
21. Tsai AC, Ku PY, Tsai PD. Population-specific anthropometric cutoff standards improve the functionality of the Mini Nutritional Assessment without BMI in institutionalized elderly in Taiwan. *J Nutr Health Aging.* 2008; 12: 696–700. PMID: 19043644
22. Katz S, Ford AB, Moskowitz RW, Jackson BA, Jaffe MW. Studies of illness in the age. The index of ADL: a standardized measurement of biological and psychological function. *JAMA.* 1963; 185: 914–919. PMID: 14044222
23. Aoki Y, Yoon SS, Chong Y, Carroll MD. Hypertension, abnormal cholesterol, and high body mass index among non-Hispanic Asian adults: United States, 2011–2012. *NCHS Data Brief.* 2014; 140: 1–8.
24. Lin SJ, Hwang SJ, Liu CY, Lin HR. The relationship between nutritional status and physical function, admission frequency, length of hospital stay, and mortality in old people living in long-term care facilities. *J Nurs Res.* 2012; 20: 110–121. <https://doi.org/10.1097/jnr.0b013e318254eac9> PMID: 22592106
25. Rolland Y, Lauwers-Cances V, Cournot M, Nourhashémi F, Reynish W, Rivière D, et al. Sarcopenia, calf circumference, and physical function of elderly women: a cross-sectional study. *J Am Geriatr Soc.* 2003; 51: 1120–1124. PMID: 12890076
26. Landi F, Onder G, Russo A, Liperoti R, Tosato M, Martone AM, et al. Calf circumference, frailty and physical performance among older adults living in the community. *Clin Nutr.* 2014; 33: 539–544. <https://doi.org/10.1016/j.clnu.2013.07.013> PMID: 23948128
27. Enoki H, Kuzuya M, Masuda Y, Hirakawa Y, Iwata M, Hasegawa J, et al. Anthropometric measurements of mid-upper arm as a mortality predictor for community-dwelling Japanese elderly: the Nagoya longitudinal study of frail elderly (NLS-FE). *Clin Nutr.* 2007; 26: 597–604. <https://doi.org/10.1016/j.clnu.2007.06.008> PMID: 17669559
28. Izawa S, Enoki H, Hirakawa Y, Iwata M, Hasegawa J, Iguchi A, et al. The longitudinal change in anthropometric measurements and the association with physical function decline in Japanese community-dwelling frail elderly. *Br J Nutr.* 2010; 103: 289–294. <https://doi.org/10.1017/S0007114509991723> PMID: 19747412
29. Bahat G, Tufan F, Saka B, Akin S, Ozkaya H, Yucel N, et al. Which body mass index (BMI) is better in the elderly for functional status? *Arch Gerontol Geriatr* 2012; 54: 78–81. <https://doi.org/10.1016/j.archger.2011.04.019> PMID: 21628078
30. Deschamps V, Astier X, Ferry M, Rainfray M, Emeriau JP, Barberger-Gateau P. Nutritional status of healthy elderly persons living in Dordogne, France, and relation with mortality and cognitive or functional decline. *Eur J Clin Nutr.* 2002; 56: 305–312. <https://doi.org/10.1038/sj.ejcn.1601311> PMID: 11965506
31. Larrieu S, Pérès K, Letenneur L, Berr C, Dartigues JF, Ritchie K, et al. Relationship between body mass index and different domains of disability in older persons: the 3C study. *Int J Obes Relat Metab Disord.* 2004; 28: 1555–1560. <https://doi.org/10.1038/sj.ijo.0802755> PMID: 15314627
32. Wee CC, Huskey KW, Ngo LH, Fowler-Brown A, Leveille SG, Mittlemen MA, et al. Obesity, race, and risk for death or functional decline among Medicare beneficiaries: a cohort study. *Ann Intern Med* 2011; 154: 645–655. <https://doi.org/10.7326/0003-4819-154-10-201105170-00003> PMID: 21576532

33. Corona LP, Pereira de Brito TR, Nunes DP, da Silva Alexandre T, Ferreira Santos JL, de Oliveira Duarte YA, et al. Nutritional status and risk for disability in instrumental activities of daily living in older Brazilians. *Public Health Nutr* 2014; 17: 390–395. <https://doi.org/10.1017/S1368980012005319> PMID: [23237425](https://pubmed.ncbi.nlm.nih.gov/23237425/)
34. Cournot M, Marquie´ JC, Ansiau D, Martinaud C, Fonds H, Ferrières J, et al. Relation between body mass index and cognitive function in healthy middle-aged men and women. *Neurol* 2006; 67: 1208–1214.
35. Kivipelto M, Ngandu T, Fratiglioni L, Viitanen M, K reholt I, Winblad B, et al. Obesity and vascular risk factors at midlife and the risk of dementia and Alzheimer disease. *Arch Neurol* 2005; 62: 1556–1560. <https://doi.org/10.1001/archneur.62.10.1556> PMID: [16216938](https://pubmed.ncbi.nlm.nih.gov/16216938/)
36. Whitmer RA, Gunderson EP, Barrett-Connor E, Quesenberry CP Jr, Yaffe K. Obesity in middle age and future risk of dementia: A 27-year longitudinal population based study. *BMJ* 2005; 330: 1360. <https://doi.org/10.1136/bmj.38446.466238.E0> PMID: [15863436](https://pubmed.ncbi.nlm.nih.gov/15863436/)
37. Booth HP, Prevost AT, Gulliford MC. Impact of body mass index on prevalence of multimorbidity in primary care: cohort study. *Fam Pract* 2014; 31: 38–43. <https://doi.org/10.1093/fampra/cmt061> PMID: [24132593](https://pubmed.ncbi.nlm.nih.gov/24132593/)
38. Wikstr m K, Lindstr m J, Harald K, Peltonen M, Laatikainen T. Clinical and lifestyle-related risk factors for incident multimorbidity: 10-year follow-up of Finnish population-based cohorts 1982–2012. *Eur J Intern Med* 2015; 26: 211–216. <https://doi.org/10.1016/j.ejim.2015.02.012> PMID: [25747490](https://pubmed.ncbi.nlm.nih.gov/25747490/)
39. Reuben DB, Siu AL, Kimpau S. The predictive validity of self-reported and performance-based measures of function and health. *J Gerontol* 1992; 47: M106–M110. PMID: [1624692](https://pubmed.ncbi.nlm.nih.gov/1624692/)
